# Supplementary material for: Co-expression of YAP and TAZ associates with chromosomal instability in human cholangiocarcinoma
Source: PubMed Central journal article supplement (PMC8496054; doi:10.1186/s12885-021-08794-5), 2021-10-06

Suppl. Figure S1

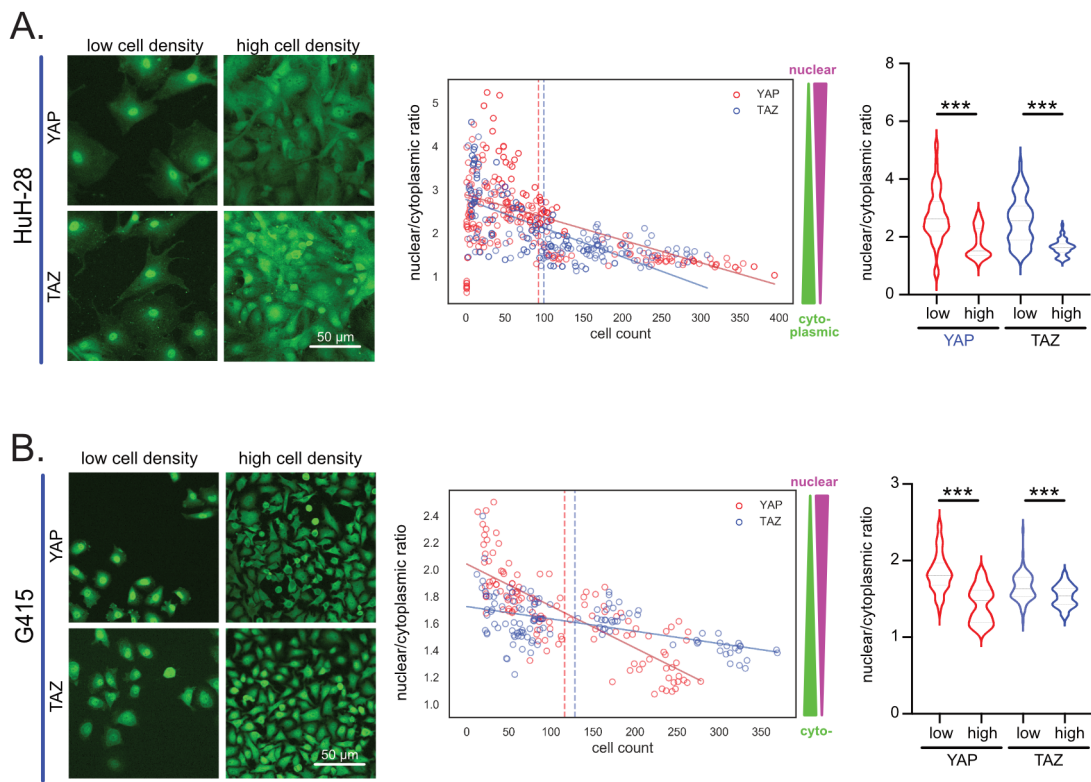

Supplement: 12885_2021_8794_MOESM1_ESM.pdf [file 12885_2021_8794_MOESM1_ESM.pdf]
